# Supplementary material for: Tropical peat fire emissions: 2019 field measurements in Sumatra and Borneo and synthesis with previous studies
Source: Copernicus journal article supplement (doi:10.5194/acp-22-10173-2022), 2022-08-09
Supplement: Supplementary file 1 [file acp-22-10173-2022-supplement.zip]

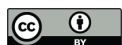

*Supplement of*

## **Tropical peat fire emissions: 2019 field measurements in Sumatra and Borneo and synthesis with previous studies**

**Robert J. Yokelson et al.**

*Correspondence to:* Robert J. Yokelson (bob.yokelson@umontana.edu)

- acp-22-10173-2022-supplement-title-page.pdf
- acp-2022-211-sp2
  - acp-2022-211-sp.xlsx

The copyright of individual parts of the supplement might differ from the article licence.
