# Supplementary material for: Tropical peat fire emissions: 2019 field measurements in Sumatra and Borneo and synthesis with previous studies
Source: Copernicus journal article supplement (doi:10.5194/acp-22-10173-2022), 2022-08-09
Supplement: Supplementary file 1 [file acp-2022-211-sp.xlsx]

## Sheet: TABLE S1 Field site details
Table S1. Peat smoke sampling site details. "nr" indicates no recorded observation.
																	m/s	%
Province	Date (m/d/y)	Local time	SampleID	WAS canister #	Smoke/Background	Plume notes	Location	Smoke color	original cordinate entries		Longitude	Latitude	UTMzone	Easting	Northing	Weather (grouped)	Wind Speed	R Humidity	Temperature (ᴼC)	Elevation (f)	Peat depth	Land use	Additional notes
Riau	2019-09-04	15:03:00	1	040	Background (ambient)	nr	Desa Rimbo Panjang, Kampar	nr	101°16'38" E	00°27'22'' N	101.277	0.456111	47N	753457	50454.1	see individual entries to right	1.8	60	31.8	30	nr	recent palm oil	Next to the road
Riau	2019-09-04	15:11:00	2	4184	Fire (smoke 1)	nr	Desa Rimbo Panjang, Kampar	nr	101°16'35,1" E	00°27'24,4" N	101.276	0.456778	47N	753367	50527.8	"	2.3	"465"	36.5	30	nr	recent palm oil	Next to the road
Riau	2019-09-04	16:25:00	3	035D	fire (smoke 2)	nr	Desa Manunggal, Kampar	nr	101°21'25,8" E	00°26'39,1" N	101.357	0.444194	47N	762360	49138.7	"	0.7	65	30.5	28	nr	current palm oil
Riau	2019-09-04	16:30:00	4	9492	fire (smoke 3)	nr	Desa Manunggal, Kampar	nr	101°21'26,1" E	00°26'37,7" N	101.357	0.443806	47N	762370	49095.7	"	0.6	62	32.3	28	nr	current palm oil
Riau	2019-09-04	16:35:00	5	030 D	fire (smoke 4)	nr	Desa Manunggal, Kampar	nr	101°21'26" E	0°26'36" N	101.357	0.443333	47N	762366	49043.4	"	0.4	58	33	28	nr	current palm oil
Riau	2019-09-04	16:54:00	6	8044	Background (ambient)	nr	Desa Manunggal, Kampar	nr	101°21'28,9" E	00°26'45,4" N	101.358	0.445944	47N	762456	49332.3	"	0.5	70	31.3	22	nr	current palm oil
Riau	2019-09-30	15:42:00	7	6386	fire (area 1)	nr	Desa Rimbo Panjang, Kampar	nr	101°21'1" E	0°27'12,6" N	101.35	0.4535	47N	761593	50167.9	"	0.5	66	37	84.7	nr	recent palm oil
Riau	2019-09-30	15:42:00	8	8208	Fire (replication# 1)	nr	Desa Rimbo Panjang, Kampar	nr	101°21'1" E	0°27'12,6" N	101.35	0.4535	47N	761593	50167.9	"	0.5	66	37	84.7	nr	recent palm oil	Background 1 meter from sample# 7193
Riau	2019-09-30	15:55:00	9	8142	Background (ambient)	nr	Desa Rimbo Panjang, Kampar	nr	101°21'3" E	0°27'8,7" N	101.351	0.452417	47N	761655	50048	"	1	68	31.2	76.1	nr	recent palm oil	Background 4 meter from sample# 7193
Riau	2019-10-01	15:53:00	10	7224	fire (close)	nr	Desa Bukit Timah, Dumai	nr	101°23'42,2" E	1°37'16,2" N	101.395	1.62117	47N	766482	179346	"	1.8	66	30.4	44.7	nr	abandoned, grass and brush	Background 7 meter from sample# 7193
Riau	2019-10-01	15:55:00	11	7347	fire (medium)	nr	Desa Bukit Timah, Dumai	nr	101°23'42,2" E	1°37'16,2" N	101.395	1.62117	47N	766482	179346	"	3	63	30.7	44.3	nr	abandoned, grass and brush
Riau	2019-10-01	15:55:00	12	7047	fire (far)	nr	Desa Bukit Timah, Dumai	nr	101°23'42,2" E	1°37'16,2" N	101.395	1.62117	47N	766482	179346	"	2.7	62	30.6	41.8	nr	abandoned, grass and brush
Jambi	2019-10-02	10:33:00	1	9466	Smoke	nr	Desa Puding	nr	103ᴼ 53,752' E	01ᴼ 34,151' S	103.896	-1.56918	48S	377176	9.82653e+06	"	3	66.4	30.6	35.4	nr	mix palm oil and brush
Jambi	2019-10-02	10:47:00	2	7193	Smoke	nr	Desa Puding	nr	103ᴼ 54,037' E	01ᴼ 34,254' S	103.901	-1.5709	48S	377704	9.82634e+06	"	0.7	59.9	33.6	12.1	nr	mix palm oil and brush
Jambi	2019-10-02	10:58:00	3	7051	Smoke	nr	Desa Puding	nr	103ᴼ 54,013' E	01ᴼ 34,259' S	103.9	-1.57098	48S	377660	9.82633e+06	"	0.6	55.8	33.6	1.1	nr	mix palm oil and brush
Jambi	2019-10-02	11:13:00	4	7200	Background	nr	PT. BEP Desa Puding	nr	103ᴼ 54,267' E	01ᴼ 34,427' S	103.904	-1.57378	48S	378131	9.82602e+06	"	0.5	54.4	32.1	-5.1	nr	mix palm oil and brush
Jambi	2019-10-02	11:53:00	5	6299 (BEP 2)	Smoke	nr	PT. BEP Desa Puding	nr	103ᴼ 54,689' E	01ᴼ 35,056' S	103.911	-1.58427	48S	378914	9.82486e+06	"	0.5	58.1	32.2	15.6	nr	mix palm oil and brush
Jambi	2019-10-02	12:00:00	6	7368	Smoke	nr	PT. BEP Desa Puding	nr	103ᴼ 54,687' E	01ᴼ 34,056' S	103.911	-1.5676	48S	378909	9.8267e+06	"	0.5	53.9	32	13.4	nr	mix palm oil and brush
Jambi	2019-10-02	12:09:00	7	2587	Smoke	nr	PT. BEP Desa Puding	nr	103ᴼ 54,691' E	01ᴼ 35,110' S	103.912	-1.58517	48S	378918	9.82476e+06	"	0.5	55.2	33.6	17.6	nr	mix palm oil and brush
Jambi	2019-10-02	12:24:00	8	4137 (BG 1)	Background	nr	Desa Puding	nr	103ᴼ 54,037' E	01ᴼ 34,254' S	103.901	-1.5709	48S	377704	9.82634e+06	"	0.7	59.9	33.6	12.1	nr	mix palm oil and brush
Jambi	2019-10-02	12:26:00	9	6383 (BG 2)	Background	nr	Desa Puding	nr	103ᴼ 54,037' E	01ᴼ 34,254' S	103.901	-1.5709	48S	377704	9.82634e+06	"	0.7	59.9	33.6	12.1	nr	mix palm oil and brush
Jambi	2019-10-02	12:29:00	10	9020	Background	nr	Desa Puding	nr	103ᴼ 54,037' E	01ᴼ 34,254' S	103.901	-1.5709	48S	377704	9.82634e+06	"	0.7	59.9	33.6	12.1	nr	mix palm oil and brush
Jambi	2019-10-03	12:06:00	11	9389 (Tahura 1)	Smoke	nr	Tahura OKH	nr	103ᴼ 59,479' E	01ᴼ 28,904' S	103.991	-1.48173	48S	387790	9836198	"	1.4	65.7	31.8	18.6	nr	Semak Pakis	burned in 2015
Jambi	2019-10-03	12:12:00	12	7367 (Tahura 2)	Smoke	nr	Tahura OKH	nr	103ᴼ 54,481' E	01ᴼ 28,899' S	103.908	-1.48165	48S	378523	9.8362e+06	"	1.5	63.6	33.4	10.1	nr	Semak Pakis	burned in 2015
Jambi	2019-10-03	12:20:00	13	9462 (Tahura 3)	Smoke	nr	Tahura OKH	nr	103ᴼ 59,484' E	01ᴼ 28,879' S	103.991	-1.48132	48S	387800	9.83624e+06	"	0.4	61.9	32	13.1	nr	Semak Pakis	burned in 2015
Jambi	2019-10-03	12:24:00	14	9002 (Tahura 4)	Smoke	nr	Tahura OKH	nr	103ᴼ 59,485' E	01ᴼ 28,879' S	103.991	-1.48132	48S	387801	9.83624e+06	"	0.5	61.9	33.9	13.1	nr	Semak Pakis	burned in 2015
Jambi	2019-10-03	12:29:00	15	7150(Tahura 5)	Background	nr	Tahura OKH	nr	103ᴼ 59,493' E	01ᴼ 28,891' S	103.992	-1.48152	48S	387816	9836222	"	0.5	57.9	34.7	14	nr	Semak Pakis	burned in 2015
Jambi	2019-10-03	12:37:00	16	9304 (Tahura 6)	Background	nr	Tahura OKH	nr	nr	nr	nr	nr	nr	nr	nr	"	0.5	60.3	35.1	23.6	nr	Semak Pakis	burned in 2015
Jambi	2019-10-03	12:41:00	17	9140 T (Tahura 7)	Background	nr	Tahura OKH	nr	nr	nr	nr	nr	nr	nr	nr	"	0.5	60.3	35.1	23.6	nr	Semak Pakis	burned in 2015
Jambi	2019-10-03	12:55:00	18	9141 T (Tahura 8)	Background	nr	Tahura OKH	nr	103ᴼ 59,492' E	01ᴼ 28,875' S	103.992	-1.48125	48S	387814	9.83625e+06	"	0.6	61.5	34.8	nr	nr	Semak Pakis	burned in 2015
Jambi	2019-09-06	11:25:00	19	1179	Smoke	nr	PT ATGA Desa Kota Kandis Dendang	nr	103ᴼ 59' 44,66" E	01ᴼ 15' 2,11" S	103.996	-1.25059	48S	388272	9.86175e+06	"	2.4	62,6	31.7	nr	nr	Kelapa Sawit	burned in 2015
Jambi	2019-09-06	11:36:00	20	1263	Smoke	nr	PT ATGA Desa Kota Kandis Dendang	nr	103ᴼ 59' 47" E	01ᴼ 15' 2" S	103.996	-1.25056	48S	388344	9.86175e+06	"	0.8	53	35.3	nr	nr	Kelapa Sawit	burned in 2015
Jambi	2019-09-06	12:04:00	21	097	Smoke	nr	PT ATGA Desa Kota Kandis Dendang	nr	103ᴼ 59' 55,2" E	01ᴼ 15' 12" S	103.999	-1.25333	48S	388597	9.86145e+06	"	2.9	57.2	33	nr	nr	Kelapa Sawit	burned in 2015
Jambi	2019-09-06	12:24:00	22	9491	Background	nr	PT ATGA Desa Kota Kandis Dendang	nr	103ᴼ 59' 41" E	01ᴼ 14' 50" S	103.995	-1.24722	48S	388158	9.86212e+06	"	1.6	52.9	35.6	nr	nr	Kelapa Sawit	burned in 2015
SSumatra	2019-10-08	09:22 WIB	1	9482 (TMP 001-2019)	Smoke	nr	Tempirai	Light Smoke, white until light grey	104.9243.8	03.4638.5	104.962	-3.51069	48S	495798	9.61196e+06	Wind speed 2,2 m/s, temperature 30° C, RH 71,2 %	nr	nr	nr	nr	1,5 m-2 m	Abandon land, shrub-dominated vegetation, fuel load: light to medium, dominated by ferns, some trees are found (purun and gelam) with the height of 3-5 m
SSumatra	2019-10-08	10:01 WIB	2	9477 (TMP 001-2019)	Background	nr	Tempirai	nr	104.9746.3	03.4640.2	104.963	-3.51117	48S	495875	9.61191e+06	Win speed 2,7 m/s, temperature 31,2 °C, RH 60,6 %	nr	nr	nr	nr	1,5 m-2 m	Abandon land, shrub-dominated vegetation, fuel load: light to medium, dominated by ferns, some trees are found (purun and gelam) with the height of 3-5 m
SSumatra	2019-10-08	14.13 WIB	3	9480 (KLB 001-2019)	Smoke	nr	Kayulabu	Light Smoke, white until light grey	105.1212.4	03.5100.4	105.203	-3.51678	48S	522596	9611283	Wind speed 0,5 m/s, temperature 30,1°C, RH 67,1 %	nr	nr	nr	nr	1,5 m-2 m	Abandon land, shrub-dominated vegetation, fuel load: light to medium, dominated by ferns and gelam with the height of 2-5 m
SSumatra	2019-10-08	14:39 WIB	4	9481 (KLB 001-2019)	Background	nr	Kayulabu	nr	105.2040.	03.5169.	105.344	-3.86917	48S	538242	9.57233e+06	Wind speed 2,2 m/s, temperature 31,2 °C, RH 62,3%	nr	nr	nr	nr	1,5 m-2 m	Abandon land, shrub-dominated vegetation, fuel load: light to medium, dominated by ferns and gelam with the height of 2-5 m
SSumatra	2019-10-09	14:21 WIB	5	1043 (KLB 002-2019)	Smoke	nr	Kayulabu	Light Smoke, white until creamy-white	105.11302.	03.52549.	105.203	-3.51661	48S	522549	9611302	Wind speed 0,7 m/s, temperature 36.4 °C, RH 43%	nr	nr	nr	nr	1,5 m	Abandon land, shrub-dominated vegetation, fuel load: light to medium, dominated by ferns and gelam with the height of 2-5 m
SSumatra	2019-10-09	14:33 WIB	6	1031 (KLB 002-2019)	Background	nr	Kayulabu	nr	105.11301.	03.52597.	105.203	-3.51662	48S	522597	9611301	Wind speed 1,7 m/s, temperature 34,3 °C, H 43%	nr	nr	nr	nr	1,5 m	Abandon land, shrub-dominated vegetation, fuel load: light to medium, dominated by ferns and gelam with the height of 2-5 m
SSumatra	2019-10-10	16:10 WIB	7	1032 (SMA 001-2019)	Smoke 1 m	nr	Senasi Mulya	Light to thick smoke, white	105.1340.2	03.3111.2	105.228	-3.51978	48S	525305	9.61095e+06	Wind speed 2,9 m/s, temperature 33,5°C, H 43%	nr	nr	nr	nr	1 m	Abandon land, shrub-dominated vegetation, fuel load: light to medium, dominated by ferns and gelam with the height of 2-5 m
SSumatra	2019-10-10	16:24 WIB	8	1044 (SMA 001-2019)	Smoke 3 m	nr	Senasi Mulya	Light to thick smoke, white	105.1340.2	03.3111.2	105.228	-3.51978	48S	525305	9.61095e+06	Wind speed 2,9 m/s, temperature 33,5°C, H 43%	nr	nr	nr	nr	1 m	Abandon land, shrub-dominated vegetation, fuel load: light to medium, dominated by ferns and gelam with the height of 2-5 m
SSumatra	2019-10-10	16:29 WIB	9	1042 (SMA 001-2019)	Smoke 5 m	nr	Senasi Mulya	Light to thick smoke, white	105.1340.2	03.3111.2	105.228	-3.51978	48S	525305	9.61095e+06	Wind speed 2,9 m/s, temperature 33,5°C, H 43%	nr	nr	nr	nr	1 m	Abandon land, shrub-dominated vegetation, fuel load: light to medium, dominated by ferns and gelam with the height of 2-5 m
SSumatra	2019-10-10	16:43 WIB	10	9484 (SMA 001-2019)	Background	nr	Senasi Mulya	nr	105.1341.4	03.3109.4	105.228	-3.51928	48S	525342	9.61101e+06	Wind speed 2,9 m/s, temperature 33,5 °C, H 43%	nr	nr	nr	nr	1 m	Abandon land, shrub-dominated vegetation, fuel load: light to medium, dominated by ferns and gelam with the height of 2-5 m
SSumatra	2019-10-11	09:45 WIB	11	1041 (TMP 003-2019)	Smoke 1 m	nr	Tempirai	Light to thick smoke, white and greyish	104.5756.5	03.3048.6	104.966	-3.5135	48S	496190	9.61165e+06	Wind speed 0,3 m/s, temperature 34,8 °C, H 50%	nr	nr	nr	nr	3-7 m	Abandon land, shrub-dominated vegetation, fuel load: light to medium, dominated by ferns, some trees are found (purun and gelam) with the height of 3-5 m
SSumatra	2019-10-11	09:45 WIB	12	1034 (TMP 003-2019)	Smoke 2,5 m	nr	Tempirai	Light to thick smoke, white and greyish	104.5756.5	03.3048.6	104.966	-3.5135	48S	496190	9.61165e+06	Wind speed 0,3 m/s, temperature 34,8 °C, H 50%	nr	nr	nr	nr	3-7 m	Abandon land, shrub-dominated vegetation, fuel load: light to medium, dominated by ferns, some trees are found (purun and gelam) with the height of 3-5 m
SSumatra	2019-10-11	09:55 WIB	13	1028 (TMP 003-2019)	Background	nr	Tempirai	nr	104.5761.7	03.3053.3	104.967	-3.51481	48S	496350	9.6115e+06	Wind speed 1,1 m/s, temperature 32,8°C, H 54%	nr	nr	nr	nr	3-7 m	Abandon land, shrub-dominated vegetation, fuel load: light to medium, dominated by ferns, some trees are found (purun and gelam) with the height of 3-5 m
SSumatra	2019-10-11	09:20 WIB	14	6342 (TMP 002-2019)	Smoke	nr	Tempirai	Light to thick smoke, white and greyish	104.5746.8	03.3041.2	104.963	-3.51144	48S	495890	9.61187e+06	Wind speed 2,8 m/s, temperature 31,2°C, H 64,7%	nr	nr	nr	nr	3-7 m	Abandon land, shrub-dominated vegetation, fuel load: light to medium, dominated by ferns, some trees are found (purun and gelam) with the height of 3-5 m
SSumatra	2019-10-11	09:04 WIB	15	1033 (TMP 002-2019)	Background	nr	Tempirai	nr	104.5780.9	03.3071.0	104.972	-3.51972	48S	496943	9610960	Wind speed 1,6 m/s, temperature 31,2°C, H %	nr	nr	nr	nr	3-7 m	Abandon land, shrub-dominated vegetation, fuel load: light to medium, dominated by ferns, some trees are found (purun and gelam) with the height of 3-5 m
SSumatra	2019-11-09	17:51:00	16	1026 (SMA 002-2019)	Smoke 1 m	nr	Senasi Mulya	Light to thick smoke, white	105.1343.6	03.519.9	105.229	-3.51917	48S	525410	9.61102e+06	Wind speed 1,1 m/s, temperature 30,4°C, H 50%	nr	nr	nr	nr	1-1,5 m	Abandon land, shrub-dominated vegetation, fuel load: light to medium, dominated by herbs and 1-m height of gelam	elevation 20,4 mdpl
SSumatra	2019-11-09	17:58:00	17	1039 (SMA 002-2019)	Background	nr	Senasi Mulya	nr	105.1343.6	03.519.5	105.229	-3.51917	48S	525410	9.61102e+06	Wind speed 1,8 m/s, temperature 29,9°C, H 50%	nr	nr	nr	nr	1-1,5 m	Abandon land, shrub-dominated vegetation, fuel load: light to medium, dominated by herbs and 1-m height of gelam	elevation 22 mdpl
SSumatra	2019-11-10	11:15:00	18	7341 (SMA 003-2019)	Smoke 1 m	nr	Senasi Mulya	Light to thick smoke, white and creamy	105.2224.4	03.5225.8	105.373	-3.87383	48S	541461	9.57181e+06	Wind speed 2,7 m/s, temperature 34,9°C, H 44%	nr	nr	nr	nr	1,5-2 m	Abandon land, shrub-dominated vegetation, fuel load: light to medium, dominated by herbs and 1-m height of gelam	elevation 23,5 mdpl
SSumatra	2019-11-10	11:20:00	19	1027 (SMA 003-2019)	Smoke 2 m	nr	Senasi Mulya	Light to thick smoke, white and creamy	105.2224.4	03.5225.8	105.373	-3.87383	48S	541461	9.57181e+06	Wind speed 2,7 m/s, temperature 34,9°C, H 44%	nr	nr	nr	nr	1,5-2 m	Abandon land, shrub-dominated vegetation, fuel load: light to medium, dominated by herbs and 1-m height of gelam	elevation 23,5 mdpl
SSumatra	2019-11-10	11:35:00	20	1035 (SMA 003-2019)	Background	nr	Senasi Mulya	nr	105.2280.2	03.5225.8	105.389	-3.87383	48S	543182	9.57181e+06	Wind speed 2,8 m/s, temperature 36,5°C, H 42%	nr	nr	nr	nr	1,5-2 m	Abandon land, shrub-dominated vegetation, fuel load: light to medium, dominated by herbs and 1-m height of gelam	elevation 23,5 mdpl
SSumatra	2019-11-12	14:02:00	21	1036 (SMA 004-2019)	Smoke 1 m	nr	Senasi Mulya	Light to thick smoke, white and light creamy	105.2280.2	03.5225.8	105.389	-3.87383	48S	543182	9.57181e+06	Wind speed 2,7 m/s, temperature 36°C, H 44,8%	nr	nr	nr	nr	1,5-2 m	Abandon land, shrub-dominated vegetation, fuel load: light to medium, dominated by herbs and 1-2 m height of gelam	Wind blow from east to west
SSumatra	2019-11-12	14:04:00	22	1025 (SMA 004-2019)	Smoke 2 m	nr	Senasi Mulya	Light to thick smoke, white and light creamy	105.2280.2	03.5225.8	105.389	-3.87383	48S	543182	9.57181e+06	Wind speed 2,7 m/s, temperature 36°C, H 44,8%	nr	nr	nr	nr	1,5-2 m	Abandon land, shrub-dominated vegetation, fuel load: light to medium, dominated by herbs and 1-2 m height of gelam	Wind blow from east to west
SSumatra	2019-11-12	14:06:00	23	1040 (SMA 004-2019)	Smoke 5 m	nr	Senasi Mulya	Light to thick smoke, white and light creamy	105.2280.2	03.5225.8	105.389	-3.87383	48S	543182	9.57181e+06	Wind speed 2,7 m/s, temperature 36°C, H 44,8%	nr	nr	nr	nr	1,5-2 m	Abandon land, shrub-dominated vegetation, fuel load: light to medium, dominated by herbs and 1-2 m height of gelam	Wind blow from east to west
SSumatra	2019-11-12	14:08:00	24	1038 (SMA 005-2019)	Smoke 1 m	nr	Senasi Mulya	Light to thick smoke, white and light creamy	105.1340.6	03.5119.9	105.228	-3.52219	48S	525317	9.61068e+06	Wind speed 2,7 m/s, temperature 38,4°C, H 41,8%	nr	nr	nr	nr	1,5-2 m	Abandon land, shrub-dominated vegetation, fuel load: light to medium, dominated by herbs and 1-2 m height of gelam	Wind blow from east to west
CKalimantan	2019-10-13	11:59 WIB	1	(061) ( ID EKK-MTU-001-2019)	Smoke	Spot 1	CANAL WETLAND	Light to thick smoke, white to light grey	S:0233307	E:9752927	114.602	-2.23337	UTM 50S	233307	9752927	Wind speed 1,2 m/s, Temperature 38,6°C	nr	nr	nr	nr	7-8 m	Abandoned land, dominated by ferns, fuel load: light to medium, shrub-dominated vegetation
CKalimantan	2019-10-13	12:21 WIB	2	(136) ( ID EKK-MTU-001-2019)	Background	nr	CANAL WETLAND	Clear atmosphere	S:0233113	E:9752979	114.6	-2.23289	UTM 50S	233113	9752979	Wind speed 0,6 m/s, Temperature 36,2°C, H 45%	nr	nr	nr	nr	7-8 m	Abandoned land, dominated by ferns, fuel load: light to medium, shrub-dominated vegetation
CKalimantan	2019-10-13	13:11 WIB	3	(109) ( ID EKK-MTU-003-2019)	Smoke	Spot 1	Canal Bapak Rista	Light to thick smoke, white to light grey	S:0228628	E:9744501	114.56	-2.30946	UTM 50S	228628	9744501	Wind speed 1,0 m/s, Temperature 34,9°C	nr	nr	nr	nr	4-6 m	Some area covered by rubber plantation
CKalimantan	2019-10-13	14:16 WIB	4	(060) ( ID EKK-MTU-003-2019)	Background	nr	Canal Bapak Rista	Clear atmosphere	S:0228548	E:9744602	114.559	-2.30855	UTM 50S	228548	9744602	Wind speed 0,8 m/s, Temperature 34,6°C	nr	nr	nr	nr	4-6 m	Some area covered by rubber plantation
CKalimantan	2019-10-14	15:03 WIB	5	(092) ( ID EKK-MTU-003-2019)	Smoke	Spot 2	Canal Bapak Rista	Light to thick smoke, white to light grey	S:0228538	E:9744530	114.559	-2.3092	UTM 50S	228538	9744530	Wind speed 0,8 m/s, Temperature 33,6°C	nr	nr	nr	nr	4-6 m	Some area covered by rubber plantation
CKalimantan	2019-10-14	15:23 WIB	6	(138) ( ID EKK-MTU-003-2019)	Smoke	Spot 3	Canal Bapak Rista	Light to thick smoke, white to light grey	S:0228503	E:9744478	114.559	-2.30967	UTM 50S	228503	9744478	Wind speed 1,1m/s, Temperature 33,8°C	nr	nr	nr	nr	4-6 m	Some area covered by rubber plantation
CKalimantan	2019-10-14	11:29 WIB	7	(095) ( ID EKK-MTU-003-2019)	Smoke	Spot 4	Canal Bapak Rista	Light to thick smoke, white to light grey	S:0228999	E:9742316	114.563	-2.32922	UTM 50S	228999	9742316	Wind speed 0,7 m/s, Temperature 35,2°C, H 55%	nr	nr	nr	nr	4-6 m	Some area covered by rubber plantation
CKalimantan	2019-10-14	12:52 WIB	8	(126) ( ID EKK-MTU-006-2019)	Smoke	Spot 1	Canal Jayanti	Light to thick smoke, white to light grey	S:0229152	E:9741706	114.565	-2.33473	UTM 50S	229152	9741706	Wind speed 0,4 m/s, Temperature 36,1°C, H 52%	nr	nr	nr	nr	4-6 m	Abandoned land, dominated by ferns, fuel load: light to medium, shrub-dominated vegetation
CKalimantan	2019-10-15	14:13 WIB	9	(134) ( ID EKK-MTU-006-2019)	Smoke	Spot 2	Canal Jayanti	Light to thick smoke, white to light grey	S:0229186	E:9741721	114.565	-2.3346	UTM 50S	229186	9741721	Wind speed 0,6 m/s, Temperature 35,7°C, H 47%	nr	nr	nr	nr	4-6 m	Abandoned land, dominated by ferns, fuel load: light to medium, shrub-dominated vegetation
CKalimantan	2019-10-15	14:40 WIB	10	(137) ( ID EKK-MTU-006-2019)	Background	nr	Canal Jayanti	Clear atmosphere	S:0229224	E:9741918	114.565	-2.33282	UTM 50S	229224	9741918	Wind speed 0,6 m/s, Temperature 35,3°C, H 55%	nr	nr	nr	nr	4-6 m	Abandoned land, dominated by ferns, fuel load: light to medium, shrub-dominated vegetation
CKalimantan	2019-10-15	10:18 WIB	11	(121) ( ID EKK-MTU-005-2019-002)	Smoke	Spot 1	Canal Jayanti	Light to thick smoke, white to light grey	S:0229507	E:9740029	114.568	-2.3499	UTM 50S	229507	9740029	Wind speed 1,3 m/s, Temperature 37,2°C, H 58%	nr	nr	nr	nr	4-6 m	Some area covered by rubber plantation
CKalimantan	2019-10-12	10:47 WIB	12	(034 D) ( ID EKK-MTU-005-2019-002)	Smoke	Spot 2	Canal Jayanti	Light to thick smoke, white to light grey	S:0229460	E:9741724	114.567	-2.33457	UTM 50S	229460	9741724	Wind speed 1,6 m/s, Temperature 34,3°C, H 52%	nr	nr	nr	nr	4-6 m	Some area covered by rubber plantation
CKalimantan	2019-10-12	11:05 WIB	13	(037 D) ( ID EKK-MTU-005-2019-002)	Background	nr	Canal Jayanti	Clear atmosphere	S:0229190	E:9741725	114.565	-2.33456	UTM 50S	229190	9741725	Wind speed 0,9 m/s, Temperature 33,1°C, H 55%	nr	nr	nr	nr	4-6 m	Some area covered by rubber plantation
CKalimantan	2019-10-29	12:45 WIB	14	(051) ( ID EKK-MTU-008-2019-001)	Smoke 1.m	Spot 1	Garitik	Light to thick smoke, creamy-white	S:0228501	E:9748126	114.559	-2.27669	UTM 50S	228501	9748126	Wind speed 1,3 m/s, Temperature 36,4°C, H 45%,Cloud cover 5%	nr	nr	nr	nr	6-8 m	Abandoned land, some trees from rehabilitation project of BOSF-MAWAS are found
CKalimantan	2019-10-29	13:04 WIB	15	(2010) ( ID EKK-MTU-008-2019-001)	Background	Spot 1	Garitik	nr	S:0228418	E:9748106	114.558	-2.27687	UTM 50S	228418	9748106	Wind speed 0,3 m/s, Temperature 37,1°C, H 43%,Cloud cover 5%	nr	nr	nr	nr	6-8 m	Abandoned land, some trees from rehabilitation project of BOSF-MAWAS are found
CKalimantan	2019-10-30	08:24 WIB	16	(131) ( ID EKK-MTU-008-2019-001)	Smoke 50 cm	Spot 2	Garitik	Light to thick smoke, creamy-white	S:0228486	E:9749206	114.559	-2.26693	UTM 50S	228486	9749206	Wind speed 0,8 m/s, Temperature 32,1°C, H 64%,Cloud cover 10%	nr	nr	nr	nr	6-8 m	Abandoned land, some trees from rehabilitation project of BOSF-MAWAS are found
CKalimantan	2019-10-30	10:13 WIB	17	(003) ( ID EKK-MTU-008-2019-001)	Smoke 50 cm	Spot 3	Garitik	Light to thick smoke, creamy-white	S:0228482	E:9749232	114.559	-2.26669	UTM 50S	228482	9749232	Wind speed 0,8 m/s, Temperature 37,3°C, H 47%,Cloud cover 10%	nr	nr	nr	nr	6-8 m	Abandoned land, some trees from rehabilitation project of BOSF-MAWAS are found
CKalimantan	2019-10-30	16:28 WIB	18	(046) ( ID EKK-MTU-008-2019-001)	Smoke 1.m	Spot 4	Garitik	Light to thick smoke, creamy-white	S:0228466	E:9749248	114.559	-2.26655	UTM 50S	228466	9749248	Wind speed 0,6 m/s, Temperature 29,6°C, H 59%,Cloud cover 30%	nr	nr	nr	nr	6-8 m	Abandoned land, some trees from rehabilitation project of BOSF-MAWAS are found
CKalimantan	2019-10-30	16:34 WIB	19	(135) ( ID EKK-MTU-008-2019-001)	Smoke 3.m	Spot 4	Garitik	Light to thick smoke, creamy-white	S:0228466	E:9749248	114.559	-2.26655	UTM 50S	228466	9749248	Wind speed 0,6 m/s, Temperature 29,6°C, H 59%,Cloud cover 30%	nr	nr	nr	nr	6-8 m	Abandoned land, some trees from rehabilitation project of BOSF-MAWAS are found
CKalimantan	2019-10-30	16:39 WIB	20	(028) ( ID EKK-MTU-008-2019-001)	Smoke 1.m	Spot 5	Garitik	Light to thick smoke, creamy-white	S:0228461	E:9749296	114.559	-2.26612	UTM 50S	228461	9749296	Wind speed 1,0 m/s, Temperature 29°C, H 69%,Cloud cover 30%	nr	nr	nr	nr	6-8 m	Abandoned land, some trees from rehabilitation project of BOSF-MAWAS are found
CKalimantan	2019-10-30	16:55 WIB	21	(002) ( ID EKK-MTU-008-2019-001)	Smoke 3.m	Spot 5	Garitik	Light to thick smoke, creamy-white	S:0228461	E:9749296	114.559	-2.26612	UTM 50S	228461	9749296	Wind speed 1,0 m/s, Temperature 29°C, H 69%,Cloud cover 30%	nr	nr	nr	nr	6-8 m	Abandoned land, some trees from rehabilitation project of BOSF-MAWAS are found
CKalimantan	2019-11-02	12:20 WIB	22	(045) ( ID EKK-MTU-008-2019-001)	Smoke 1.m	Spot 6	Garitik	Light to thick smoke, creamy-white	S:0228600	E:9749453	114.56	-2.2647	UTM 50S	228600	9749453	Wind speed 0,8 m/s, Temperature 34,2°C, H 53%,Cloud cover 30%	nr	nr	nr	nr	6-8 m	Abandoned land, some trees from rehabilitation project of BOSF-MAWAS are found
CKalimantan	2019-11-02	12:21 WIB	23	(064) ( ID EKK-MTU-008-2019-001)	Smoke 3.m	Spot 6	Garitik	Light to thick smoke, creamy-white	S:0228600	E:9749453	114.56	-2.2647	UTM 50S	228600	9749453	Wind speed 0,8 m/s, Temperature 34,2°C, H 53%,Cloud cover 30%	nr	nr	nr	nr	6-8 m	Abandoned land, some trees from rehabilitation project of BOSF-MAWAS are found

## Sheet: TABLE S2 2019 Prov EFs
Table S2. Emission factors (g/kg) and MCE from 2019 and comparison with 2015 measurements of same species.
	#samples(#sites)	12(4)		22(4)		24(8)		23(9)		81(25)		333(35)
	province	Riau		Jambi		S. Sumatra		C. Kalimantan		2019		2015 C. Kalimantan
Name	Formula	avg	stderr	avg	stderr	avg	stderr	avg	stderr	avg	stdev	avg	stdev	2019/2015		Table notes:
MCE		0.687		0.727		0.721		0.736		0.71775	0.0214068	0.772	0.035	0.929728		stderr for province is based on stderr of slope
Carbon Dioxide (CO2)		1419.68	84.39	1510.24	88.83	1451.99	45.971	1489.09	96.29	1467.75	40.0828	1564	77	0.938459	FT15	"nm" indicates low values that are not highly correlatedwwith CO
Carbon Monoxide (CO)		412.57	24.53	361.69	21.27	358.13	11.3385	339.6	21.96	367.997	31.2531	291	49	1.2646	FT15	"FT15" was mainly measured by FTIR in 2015
Methane (CH4)		7.34	0.25	7.77	1.36	12.85	1.18536	9.7	1.11	9.415	2.50946	9.51	4.74	0.990011	FT15	FTIR/WAS across different years and sites
Dimethyl Sulfide (C2H6S)		0.0414244	0.0025833	0.0183845	0.00638733	0.112057	0.0198547	0.0629817	0.0122055	0.0587118	0.0399544	0.00281534	0.00233881	20.8542		avg	1.10572
Carbonyl sulfide (OCS)		0.118158	0.0251262	0.0838817	0.0176857	0.356093	0.0337682	0.128976	0.0210312	0.171777	0.124371	0.110351	0.0356199	1.55664		stdev	0.297147
Chloromethane (CH3Cl)		0.168389	0.0213268	0.132757	0.0160408	0.171106	0.00793995	0.195846	0.0168886	0.167024	0.025971	0.146625	0.0565204	1.13913		333 samples in 2015 is 285 by FTIR and 48 by WAS
Bromomethane (CH3Br)		0.0179058	0.00130213	0.0160577	0.00135812	0.0199903	0.00143394	0.0165282	0.00254273	0.0176205	0.00176378	0.0101255	0.00352357	1.74021		0.761386	weighted average MCE for 2015-19
Iodomethane (CH3I)		0.0285699	0.000731171	0.0117835	0.00158438	0.0149977	0.00107041	0.0202324	0.00294542	0.0188959	0.0073293	0.0124939	0.00447953	1.51241
Methyl nitrate (CH3ONO2)		2.92609e-05	8.86207e-05	6.74595e-05	1.12491e-05	0.000332911	2.02325e-05	0.000424549	0.000160335	0.000213545	0.000194998	nm	nm
Ethyl nitrate (C2H5ONO2)		2.65121e-05	3.86584e-06	2.51488e-05	5.90126e-06	6.75392e-05	6.25849e-06	0.000107196	8.268e-05	5.65991e-05	3.90475e-05	nm	nm
i-Propyl nitrate (C3H7NO3)		0.000357245	2.23056e-05	nm	nm	0.000470336	6.1264e-05	0.000936793	0.000320611	0.000588125	0.000307205	nm	nm
n-Propyl nitrate (C3H7NO3)		1.03686e-05	2.30482e-06	nm	nm	3.38063e-05	5.93954e-06	6.16953e-05	2.60702e-05	3.529e-05	2.56955e-05	nm	nm
Ethane (C2H6)		1.24523	0.0367864	1.16347	0.145678	3.43447	0.397802	3.37965	0.514836	2.30571	1.27237	1.52242	0.655272	1.5145
Ethene (C2H4)		0.792741	0.0667461	0.737902	0.103346	1.73747	0.159649	1.7416	0.244552	1.25243	0.56291	0.960976	0.527589	1.30329	FT15
Ethyne (C2H2)		0.0508693	0.00289906	0.0695759	0.00917973	0.059107	0.00456183	0.0889187	0.00736229	0.0671177	0.0164267	0.121288	0.0663249	0.553375	FT15
1,2-Propadiene (C3H4)		0.00114509	0.000170359	0.00181304	0.000478029	0.00125583	0.000114479	0.00239773	0.000212691	0.00165292	0.000576181	0.00184281	0.00227254	0.896956
Propyne (C3H4)		0.00349914	0.000361136	0.00580568	0.00222809	0.00331511	0.000309294	0.00690734	0.0011301	0.00488182	0.00176282	0.00564876	0.00857294	0.864228
Propane (C3H8)		1.18123	0.0442653	0.873493	0.135615	2.32931	0.235663	2.73837	0.43785	1.7806	0.894519	0.988804	0.643519	1.80076
Propene (C3H6)		0.996666	0.0562053	0.795281	0.127377	1.8529	0.143465	1.89542	0.272664	1.38507	0.570973	1.06677	0.531005	1.29837	FT15
i-Butane (C4H10)		0.0605598	0.00338351	0.0485382	0.00690326	0.156612	0.0194316	0.180602	0.0253479	0.111578	0.0667564	0.0911353	0.102204	1.22431
n-Butane (C4H10)		0.33117	0.00975733	0.194597	0.0359691	0.891842	0.0797184	0.969741	0.157071	0.596837	0.390922	0.320987	0.22515	1.85938
1-Butene (C4H8)		0.281189	0.00771275	0.144552	0.0258445	0.596827	0.0450254	0.607137	0.11818	0.407426	0.231514	0.181573	0.085082	2.24387
i-Butene (C4H8)		0.450331	0.0142943	0.193006	0.0349176	0.478842	0.0431772	0.580851	0.0802309	0.425757	0.164974	0.310624	0.160134	1.37065
trans-2-Butene (C4H8)		0.0900245	0.00406632	0.0572201	0.0121294	0.221974	0.0248797	0.20223	0.0353008	0.142862	0.0814651	0.0775172	0.0379587	1.84297
cis-2-Butene (C4H8)		0.0694409	0.00304084	0.0428177	0.00893638	0.178367	0.0191502	0.155676	0.0270906	0.111576	0.0655972	0.0615018	0.0333614	1.81418
i-Pentane (C5H12)		0.0522888	0.00279303	0.034358	0.00538356	0.12652	0.0142795	0.166323	0.0262458	0.0948723	0.0621344	0.123192	0.134679	0.770117
n-Pentane (C5H12)		0.283899	0.00803985	0.13443	0.0294885	0.781349	0.0692809	0.84357	0.148948	0.510812	0.354528	0.243022	0.130627	2.10192
1,3-Butadiene (C4H6)		0.0715102	0.00329518	0.0718438	0.0149739	0.146572	0.0169862	0.162154	0.0255592	0.11302	0.0481612	0.189261	0.156771	0.597166
1,3-Butadiyne (C4H2)		4.12145e-05	3.39748e-06	0.000122827	2.70747e-05	0.000109749	3.06324e-05	0.000155416	2.799e-05	0.000107302	4.80608e-05	0.000298975	0.000241655	0.358898
1,2-Butadiene (C4H6)		0.000211538	2.77165e-05	0.00041092	0.00019865	0.000263953	5.45835e-05	0.000562551	6.28233e-05	0.00036224	0.000157972	0.00061475	0.000638675	0.589248
1-Pentene (C5H10)		0.19472	0.00566493	0.0802832	0.0157708	0.462826	0.0375958	0.454706	0.0960288	0.298134	0.191304	0.109831	0.066003	2.71448
1-Hexene (C6H12)		0.237355	0.00879531	0.0937355	0.019496	0.515273	0.0327148	0.546867	0.122658	0.348308	0.219409	nm	nm
1-Heptene (C7H14)		0.186811	0.0072198	0.0646547	0.0132808	0.403182	0.0295137	0.422659	0.0973884	0.269327	0.173328	0.0790201	0.0540237	3.40833
1-Octene (C8H16)		0.138384	0.00517911	0.0476026	0.00981451	0.319632	0.024154	0.333512	0.0780518	0.209783	0.139971	0.06515	0.0424493	3.21999
1-Decene (C10H20)		0.0821024	0.00281748	0.0310782	0.0107969	0.260457	0.0185017	0.250083	0.0549148	0.15593	0.116661	0.0497961	0.0388242	3.13137
Isoprene (C5H8)		0.0631223	0.0033579	0.0673941	0.0167172	0.0763576	0.00651738	0.0871431	0.0115912	0.0735043	0.0106345	0.052806	0.043257	1.39197	FT15
trans-2-Pentene (C5H10)		0.0500532	0.00183245	0.0245095	0.00667962	0.162642	0.0192626	0.134245	0.0298977	0.0928624	0.0660466	0.0397346	0.0275903	2.33706
cis-2-Pentene (C5H10)		0.025312	0.000932795	0.0132337	0.00333168	0.086177	0.00925223	0.0721277	0.0152001	0.0492126	0.0353892	0.0223576	0.0151898	2.20116
3-Methyl-1-butene (C5H10)		0.0572052	0.00365421	0.0777818	0.0266974	0.0846603	0.0077184	0.123016	0.0244264	0.0856658	0.0274966	0.0303475	0.0198045	2.82283
2-Methyl-1-butene (C5H10)		0.036676	0.00142423	0.028957	0.00575776	0.0911853	0.0096955	0.0912754	0.0158203	0.0620234	0.0338722	0.0299315	0.0160842	2.07218
2-Methyl-2-butene (C5H10)		0.0595779	0.00194583	0.0338271	0.00709121	0.13243	0.0171262	0.133487	0.0246657	0.0898306	0.0508994	0.064682	0.0371937	1.3888
4-Methyl-1-pentene (C6H12)		0.0292335	0.0011513	0.0180861	0.00405092	0.0582693	0.00513603	0.066685	0.0111784	0.0430685	0.0231253	nm	nm
n-Hexane (C6H14)		0.191708	0.00613946	0.0808456	0.0183547	0.544108	0.0503474	0.582554	0.110428	0.349804	0.25117	0.142528	0.0871687	2.45429
n-Heptane (C7H16)		0.167951	0.00592093	0.0656803	0.0155535	0.498899	0.0466002	0.576216	0.123586	0.327186	0.24849	0.111994	0.0737939	2.92147
n-Octane (C8H18)		0.149628	0.00537931	0.0551333	0.0133847	0.470456	0.0452544	0.498414	0.101654	0.293408	0.224218	0.0979854	0.069009	2.9944
n-Nonane (C9H20)		0.106556	0.00340902	0.0371706	0.00930899	0.370894	0.0394398	0.347122	0.066578	0.215435	0.168465	0.0895269	0.0633003	2.40638
n-Decane (C10H22)		0.0919598	0.00313203	0.0301408	0.00927183	0.243707	0.0497488	0.126943	0.0425717	0.123188	0.0897624	0.0743931	0.0509035	1.6559
n-Undecane (C11H24)		0.0311262	0.00392345	0.0180158	0.00665149	0.0629548	0.0189433	0.0829166	0.0301002	0.0487534	0.0295766	nm	nm
2,2-Dimethylbutane (C6H14)		0.001309	0.000204653	0.000804765	0.000166723	0.00357481	0.000427793	0.00374449	0.000736508	0.00235826	0.00151832	nm	nm
2,3-Dimethylbutane (C6H14)		0.00449008	0.00020372	0.00259746	0.000391523	0.0120899	0.00136923	0.0122664	0.00201366	0.00786097	0.00504511	0.00531468	0.0041484	1.47911
2-Methylpentane (C6H14)		0.0195322	0.00146299	0.0195407	0.00381719	0.0730435	0.00814728	0.078389	0.0132243	0.0476263	0.0325087	0.0397043	0.0358239	1.19953
3-Methylpentane (C6H14)		0.00446213	0.000345868	0.00390914	0.000844001	0.0207474	0.00240496	0.0234758	0.0038594	0.0131486	0.0104118	0.00930852	0.00800499	1.41253
2-Methylhexane (C7H16)		0.00656552	0.000830451	0.00706442	0.00126651	0.0460637	0.00563609	0.0511584	0.00827107	0.027713	0.0242213	nm	nm
3-Methylhexane (C7H16)		0.0103153	0.000404554	0.00548789	0.00116252	0.0427204	0.00524653	0.04451	0.00719774	0.0257584	0.0207261	nm	nm
2,3-Dimethylpentane (C7H16)		0.0228275	0.00306199	0.00966892	0.0014084	0.071496	0.0102959	0.0406119	0.0102553	0.0361511	0.0267581	nm	nm
Cyclopentane (C5H10)		0.00972198	0.000291012	0.00431646	0.00090745	0.0300639	0.00298522	0.0322718	0.0064948	0.0190935	0.0141445	nm	nm
Cyclohexane (C6H12)		0.0226917	0.00139371	0.0097323	0.00131714	0.0534722	0.00496859	0.05913	0.00994836	0.0362565	0.0238545	nm	nm
Methylcyclohexane (C7H14)		0.0157548	0.0010503	0.00440178	0.00135838	0.024122	0.00207454	0.0257416	0.00522202	0.017505	0.00977043	nm	nm
Cyclopentene (C5H8)		0.0703904	0.00229525	0.0269759	0.00502853	0.148641	0.0106523	0.127784	0.0249122	0.0934478	0.0553034	0.0245505	0.0156591	3.80635
Benzene (C6H6)		1.20304	0.0660072	0.862123	0.168223	2.28107	0.261959	2.20087	0.262632	1.63678	0.712164	2.11711	1.47924	0.773118
Toluene (C7H8)		0.786031	0.0290785	0.388351	0.0839384	0.955686	0.100171	0.85599	0.121723	0.746514	0.248717	0.626528	0.50544	1.19151
Ethylbenzene (C8H10)		0.136133	0.00934508	0.0423609	0.0104514	0.175493	0.023775	0.131083	0.0221603	0.121267	0.0562256	0.107033	0.0926242	1.13299
m/p-Xylene (C8H10)		0.240667	0.0119012	0.100287	0.018468	0.327999	0.0444401	0.294385	0.0492653	0.240834	0.100364	0.276027	0.253276	0.872504
o-Xylene (C8H10)		0.200444	0.00684337	0.083821	0.0168979	0.413135	0.0514441	0.310091	0.0544277	0.251873	0.141752	0.103153	0.0588697	2.44175
Styrene (C8H8)		0.091832	0.00456074	0.0394058	0.0058995	0.0808548	0.0132765	0.0535969	0.0113306	0.0664224	0.0241408	0.0270667	0.0130549	2.45403
i-Propylbenzene (C9H12)		0.00173834	0.0001094	0.000698126	0.000146652	0.00203813	0.000410643	0.00161567	0.000333266	0.00152256	0.00057756	0.00534258	0.00374408	0.284986
n-Propylbenzene (C9H12)		0.043357	0.00271912	0.0127603	0.00267596	0.0439702	0.00517085	0.0235516	0.00622488	0.0309098	0.0153737	0.0117554	0.00820274	2.62941
3-Ethyltoluene (C9H12)		0.0174728	0.000953907	0.00790203	0.00230065	0.0341515	0.00686851	0.0190572	0.00459567	0.0196459	0.0108536	0.0269602	0.0228483	0.728699
4-Ethyltoluene (C9H12)		0.0195713	0.00129514	0.00918798	0.00231685	0.0261324	0.00611652	0.0185024	0.00502323	0.0183485	0.00697671	0.0235036	0.0212986	0.780668
2-Ethyltoluene (C9H12)		0.0302678	0.00136881	0.00971076	0.00310304	0.0536136	0.0114976	0.0295181	0.00940582	0.0307776	0.0179549	0.0415877	0.0334744	0.740065
1,3,5-Trimethylbenzene (C9H12)		0.0143141	0.00101979	0.00426027	0.000992245	0.0169836	0.00413496	0.00983344	0.00337306	0.0113478	0.00557037	0.0108007	0.00855487	1.05066
1,2,4-Trimethylbenzene (C9H12)		0.0799025	0.00206517	0.0519155	0.0117146	0.141057	0.0300068	0.0696982	0.0231166	0.0856432	0.0387101	0.0695647	0.0552335	1.23113
Furan (C4H4O)		0.190198	0.0711606	0.264643	0.0495113	0.254412	0.0294618	0.415646	0.0478191	0.281225	0.095479	0.73641	0.391603	0.381886
2-Methylfuran (C5H6O)		0.0893937	0.0105746	0.129195	0.0668522	0.146694	0.032957	0.197867	0.03357	0.140787	0.0449767	0.121304	0.122754	1.16062
3-Methylfuran (C5H6O)		0.014729	0.00232197	0.0104721	0.00247286	0.0143124	0.0017367	0.0183941	0.00246002	0.0144769	0.00323899	nm	nm

## Sheet: TABLE S3 FIELD LAB COMPILATION
Table S3. Trace gas EFs (g kg-1) from field and fire lab. Suggested best value in yellow-shaded cells. Notes at bottom.
		Location and time						Malaysia	Borneo	Borneo & Sumatra Sep-Nov 2019
			Fire Lab 2016		Fire Lab 2012		Fire Lab 2001	Aug 2015 &	Oct-Nov 2015						Borneo	Borneo
								Jul 2016							2009	2015
			Fire #55 FIREX		Fire #114 FLAME-4										Tedlar, bottles	laser absorption
		Instrumentation	PTR-TOF	OP-FTIR	OP-FTIR	PTR-TOF	FTIR+PTR-MS	OP-FTIR	FTIR+WAS	WAS					IR, GC-FID
unit mass	Trace gas formula	Trace gas name	Koss et al 2018 Corrected EF	Selimovic et al 2018 EF	Stockwell et al 2015 EF	Stockwell et al 2015 EF	Christian et al 2003 Corrected EF	Smith et al 2018 EF	Stockwell et al 2016 EF	This work EF	Field Average EF	Stdev	Lab Average EF	Stdev	Hamada et al 2013 EF	Wooster et al 2018 EF
		MCE		0.8314	0.743893		0.837484	0.8	0.772	0.71775	0.756868	0.0350955	0.787647	0.0618768	0.723589	0.771
43.9898	CO2	Carbon dioxide		1687.97	1329.38		1703	1579	1564.18	1467.75	1543.64	65.678	1508.68	253.561	1484.27	1623
27.9949	CO	Carbon monoxide		217.898	291.249		210.3	251	290.511	367.997	315.404	49.1714	254.573	51.8668	360.812	306.7
2.01565	H2	Hydrogen							1.21701		1.21701
16.0313	CH4	Methane		10.3854	17.8504		20.8	11	9.51	9.415	9.79241	3.30051	14.1179	5.27854	14.0871	4.95
17.026	NH3	Ammonia	1.63767	1.6517	1.97122		19.92	7.82	2.86462		5.34231	3.50398	1.81146	0.188658
26.0151	C2H2	Acetylene	0.561722	0.123	0.205084		0.06	0.06	0.121288	0.0671177	0.0828019	0.0335194	0.164042	0.0580419
27.0104	HCN	Hydrogen cyanide	3.52459	3.9791	3.82721		8.11	3.79	5.74858		4.76929	1.38493	3.90316	0.231386
28.0308	C2H4	Ethene	0.633619	1.6891	1.52508		2.57	2.3	0.960976	1.25243	1.50447	0.704194	1.60709	0.115982
29.026	CH3N	Methanimine	5.81574e-05										5.81574e-05
30.01	CH2O	Formaldehyde	1.62053	1.2231	2.00608		1.4	0.77	0.86675		0.818375	0.0684126	1.61459	0.391507
30	C2H6	Ethane						2.17	1.52242	2.30571	1.99938	0.418591
30	NO	Nitric Oxide							0.307338		0.307338
32.0257	CH3OH	Methanol	2.7855	2.9293	3.07397		8.46	2.83	2.13533		2.48266	0.491207	3.00163	0.144233
33.9872	H2S	Hydrogen sulfide	0.254241										0.254241
36.458	HCl	Hydrogen chloride							0.0345867		0.0345867
40.0639	C3H4	1,2-Propadiene							0.00184281	0.00165292	0.00174787	0.000134273
40.0639	C3H4	Propyne							0.00564876	0.00488182	0.00526529	0.000542311
41.026	C2H3N	Acetonitrile	0.97776			0.491585							0.734672	0.343778
42.0464	C3H6	Propene	1.54437	1.6038	1.89426		3.05		1.06677	1.38507	1.22592	0.22507	1.74903	0.187227
43.0053	HNCO	Isocyanic acid	0.573984										0.573984
43.0417	C2H5N	Ethenamine	0.00517978										0.00517978
44.0257	C2H4O	Acetaldehyde	1.63946			1.36833	3.27		0.697233		0.697233		1.5039	0.191715
44.1	C3H8	Propane							0.988804	1.7806	1.3847	0.559884
45.0209	CH3NO	Formamide	0.0435753										0.0435753
45.0573	C2H7N	Ethylamine + dimethylamine	0.00116326										0.00116326
46.005	CH2O2	Formic acid	0.380463	0.3685	0.491289		0.38	0.25	0.180011		0.215005	0.0494898	0.429894	0.0677035
46.0413	C2H6O	Ethanol	0.33657										0.33657
47.0002	HONO	Nitrous acid	0.27981						0.207984		0.207984		0.27981
48.0028	CH4S	methane thiol	0.078348			0.00643126							0.0423896	0.0508528
48.0206	CH4O2	methane diol	0.000823244										0.000823244
50.49	CH3Cl	Chloromethane							0.146625	0.167024	0.156825	0.0144245
50	C4H2	1,3-Butadiyne (C4H2)							0.000298975	0.000107302	0.000203138	0.000135533
51.0104	C3HN	Propiolonitrile (=propyne nitrile)	0.00168591										0.00168591
52.0308	C4H4	1-Buten-3-yne	0.0335077			0.0273868							0.0304473	0.0043281
53.026	C3H3N	Acrylonitrile	0.0650748										0.0650748
54.01	C3H2O	2-propynal	0.0336447										0.0336447
54.0464	C4H6	1,3-Butadiene + 1,2-Butadiene + Butyne	0.474195			0.349104			0.193007	0.113382	0.153195	0.0563034	0.41165	0.0884527
54	C4H6	1,3-Butadiene							0.189261	0.11302	0.151141	0.0539104
54	C4H6	1,2-Butadiene							0.00061475	0.00036224	0.000488495	0.000178552
54	C4H6	1-Butyne							0.00198194		0.00198194
54	C4H6	2-Butyne							0.00114968		0.00114968
55.0417	C3H5N	Propane nitrile	0.0549807										0.0549807
56.0257	C3H4O	Acrolein	0.411213			0.210382							0.310797	0.142009
56.0621	C4H8	Butenes + other hydrocarbon	0.962689			1.42604			0.631215	1.08762	0.859418	0.322728	1.19436	0.327639
56.1063	C4H8	1-Butene							0.181573	0.407426	0.294499	0.159702
56.1063	C4H8	i-Butene							0.310624	0.425757	0.368191	0.081412
56.1063	C4H8	trans-2-Butene							0.0775172	0.142862	0.11019	0.0462059
56.1063	C4H8	cis-2-Butene							0.0615018	0.111576	0.0865387	0.0354075
57.0209	C2H3NO	methyl isocyanate + hydroxyacetonitrile	0.0299029										0.0299029
57.0573	C3H7N	Propene amine	0.00388679										0.00388679
58.005	C2H2O2	Glyoxal	0.0234										0.0234
58.0413	C3H6O	Acetone	1.19861			1.36658	1.25		0.690617		0.690617		1.2826	0.118769
58.12	C4H10	i-Butane							0.0911353	0.111578	0.101357	0.0144552
58.12	C4H10	n-Butane							0.320987	0.596837	0.458912	0.195056
59.0366	C2H5NO	Acetamide	0.291767			4.21203							2.2519	2.77205
59.073	C3H9N	Trimethylamine	0.0068465										0.0068465
60.0206	C2H4O2	Acetic acid + glycolaldehyde	3.9224	4.4491	4.81125		12.39		4		4		4.63018	0.446959
60.0206	C2H4O2	Acetic acid		4.4491	4.81125		8.97	5.02	3.88898		4.45449	0.799753	4.63018	0.256079
60.0206	C2H4O2	Glycolaldehyde					3.42		0.10773		0.10773
60.07	OCS	Carbonyl sulfide							0.110351	0.171777	0.141064	0.0434347
61.0159	CH3NO2	Nitromethane	0.0217895						0.0600703		0.0600703		0.0217895
62.0185	C2H6S	Dimethyl sulfide	0.0228019						0.00281534	0.0587118	0.0307636	0.0395248	0.0228019
64.0308	C5H4	1,3-Pentadiyne				0.19641							0.19641
64	SO2	Sulfur Dioxide		3.4152									3.4152
65.026	C4H3N	Cyanoallene isomers	0.000229095										0.000229095
66.0464	C5H6	1,3-Cyclopentadiene	0.0264601			0.083912			0.00997587		0.00997587		0.055186	0.0406247
67.0417	C4H5N	pyrrole + butene nitrile isomers	0.0890141										0.0890141
67.9893	C3O2	Carbon suboxide	0.00131341										0.00131341
68.0257	C4H4O	Furan	0.485331		1.01973		1.91		0.73641	0.281225	0.508817	0.321865	0.752532	0.37788
68.0621	C5H8	Isoprene	0.502163			1.39607	1.38		0.052806	0.0735043	0.0631551	0.0146359	0.949116	0.632087
68.11	C5H8	Cyclopentene							0.0245505	0.0934478	0.0589991	0.0487178
68.11	C5H8	1,3-Pentadiene							0.0198107		0.0198107
69.0573	C4H7N	Dihydropyrrole + butane nitrile	0.0407738										0.0407738
70.005	C3H2O2	Propiolic acid	0.00539767										0.00539767
70.0413	C4H6O	MVK + methacrolein + crotonaldehyde	0.315912			0.271495							0.293704	0.0314075
70.0413	C4H6O	Methyl vinyl ketone							0.0568825		0.0568825
70.0777	C5H10	Pentenes + methyl butenes	0.15046			0.457775			0.296884	0.677729	0.487306	0.269298	0.304118	0.217305
70.134	C5H10	1-Pentene							0.109831	0.298134	0.203982	0.13315
70.134	C5H10	trans-2-Pentene							0.0397346	0.0928624	0.0662985	0.037567
70.134	C5H10	cis-2-Pentene							0.0223576	0.0492126	0.0357851	0.0189894
70.134	C5H10	3-Methyl-1-butene							0.0303475	0.0856658	0.0580066	0.0391159
70.134	C5H10	2-Methyl-1-butene							0.0299315	0.0620234	0.0459775	0.0226924
70.134	C5H10	2-Methyl-2-butene							0.064682	0.0898306	0.0772563	0.0177828
70.134	C5H10	Cyclopentane								0.0190935	0.0190935
71.073	C4H9N	Butene amine	0.00184407										0.00184407
72.0206	C3H4O2	methyl glyoxal + acrylic acid	0.159818			0.208835							0.184327	0.0346606
72.057	C4H8O	MEK + butanal + 2-methylpropanal	0.409164			0.548646							0.478905	0.0986285
72.057	C4H8O	Butanal							0.0238034		0.0238034
72.057	C4H8O	Butanone							0.135965		0.135965
72.15	C5H12	i-Pentane							0.123192	0.0948723	0.109032	0.0200251
72.15	C5H12	n-Pentane							0.243022	0.510812	0.376917	0.189356
73.0159	C2H3NO2	nitroethene	0.000104625										0.000104625
74.0363	C3H6O2	Hydroxyacetone+methyl acetate + ethyl formate	0.324816			0.319985	2.21		0.860256		0.860256		0.3224	0.00341603
75.0315	C2H5NO2	Nitroethane or ethane nitrite	0.00121148										0.00121148
76.993	CH3NOS	n-sulfinyl methanamine	0.000243451										0.000243451
78.0464	C6H6	Benzene	0.818794			1.0053	3.19		0.954027	1.63678	1.2954	0.482777	0.912048	0.13188
79.0417	C5H5N	Pyridine + pentadienenitriles	0.122801										0.122801
80.0257	C5H4O	2,4-Cyclopentadiene-1-one + 2 other HCO isomers	0.0426521			0.0762832							0.0594676	0.0237808
81.0573	C5H7N	Methyl pyrrole isomers + Pentene nitrile isomers	0.0382866										0.0382866
82.0413	C5H6O	2-methylfuran + 3-methylfuran + general HCO	0.616846			0.35168			0.121304	0.155264	0.138284	0.0240135	0.484263	0.187501
82.0413	C5H6O	2-Methylfuran							0.121304	0.140787	0.131046	0.0137768
82.0413	C5H6O	3-Methylfuran								0.0144769	0.0144769
83.073	C5H9N	Pentanenitriles	0.0286144										0.0286144
84.0028	C4H4S	Thiophene	0.0319531										0.0319531
84.0206	C4H4O2	2-(3H)Furanone	0.315279			0.471576							0.393428	0.110519
84.057	C5H8O	3-methyl-3-butene-2-one + cyclopentanone + HCO1 isomers	0.177348			0.18857							0.182959	0.00793548
84.16	C6H12	1-Hexene								0.348308	0.348308
84.16	C6H12	2-Methyl-1-Pentene							0.109364		0.109364
84.16	C6H12	4-Methyl-1-pentene								0.0430685	0.0430685
84.16	C6H12	Cyclohexane								0.0362565	0.0362565
86.0363	C4H6O2	2,3-butanedione + methyl acrylate + other HCO2	0.492247			0.326161							0.409204	0.117441
86.0726	C5H10O	3-methyl-2-butanone + 2-methylbutanal+3-methylbutanal+2-pentanone +3-pentanone	0.194024			0.0435021							0.118763	0.106435
86.18	C6H14	n-Hexane							0.142528	0.349804	0.246166	0.146566
86.18	C6H14	2,2-Dimethylbutane								0.00235826	0.00235826
86.18	C6H14	2,3-Dimethylbutane							0.00531468	0.00786097	0.00658782	0.0018005
86.18	C6H14	2-Methylpentane							0.0397043	0.0476263	0.0436653	0.00560176
86.18	C6H14	3-Methylpentane							0.00930852	0.0131486	0.0112286	0.00271535
87.0679	C4H9NO	Assorted Amides				0.00301318							0.00301318
88.0155	C3H4O3	Pyruvic acid	0.000400491			0.203658							0.102029	0.143725
88.0519	C4H8O2	Methyl propanoate	0.110296			0.178168							0.144232	0.0479925
89.0472	C3H7NO2	Nitropropanes	0.000852412										0.000852412
91.0417	C6H6N	Ethylnylpyrrole	0.00250881										0.00250881
92.0621	C7H8	Toluene	0.571672			0.729252	1.55		0.370121	0.746514	0.558317	0.26615	0.650462	0.111426
93.0209	C5H3NO	2-furancarbonitrile + 3-furancarbonitrile	0.0194922										0.0194922
93.0573	C6H7N	2-methyl pyridine + 3-methylpyridine	0.0672725										0.0672725
93.9906	C2H6S2	Dimethyl disulfide	0.00395138										0.00395138
94.0413	C6H6O	Phenol	1.77999			0.700084	3.62		0.418768		0.418768		1.24004	0.763611
94.94	CH3Br	Bromomethane							0.0101255	0.0176205	0.013873	0.00529975
95.0366	C5H5NO	4-pyridinol	0.0339246										0.0339246
95.073	C6H9N	2,5-dimethyl pyrrole + 1-ethylpyrrole + other C2 substituted pyrroles	0.0179174										0.0179174
96.0206	C5H4O2	2-furfural + 3-furfural + other HCO2	1.92756			1.80238							1.86497	0.0885116
96.0206	C5H4O2	Furfural							0.123544		0.123544
96.057	C6H8O	2,5-dimethyl furan + 2-ethylfuran + other C2 substituted furans	0.384737			0.145334							0.265036	0.169283
97.0886	C6H11N	4-methylpentanenitrile	0.011266										0.011266
98.0185	C5H6S	Methyl thiophenes	0.0323988										0.0323988
98.0363	C5H6O2	2-furanmethanol + other HCO2	0.299294			0.332424							0.315859	0.0234261
98.0726	C6H10O	Methyl cyclopentanone + cyclohexanone + other ketones	0.0589941			0.15718							0.108087	0.0694281
98.19	C7H14	1-Heptene							0.0790201	0.269327	0.174173	0.134567
98.19	C7H14	Methylcyclohexane								0.017505	0.017505
100.015	C4H4O3	Dihydro furandione	0.101554			0.243404							0.172479	0.100304
100.052	C5H8O2	Methyl methacrylate + other HCO2	0.175249			0.199712							0.187481	0.0172983
100.088	C6H12O	hexanal + hexanones	0.0219791										0.0219791
100.21	C7H16	n-Heptane							0.111994	0.327186	0.21959	0.152164
100.21	C7H16	2-Methylhexane								0.027713	0.027713
100.21	C7H16	3-Methylhexane								0.0257584	0.0257584
100.21	C7H16	2,3-Dimethylpentane								0.0361511	0.0361511
102.031	C4H6O3	Acetic anhydride	0.018666			0.283683							0.151174	0.187395
102.046	C8H6	Phenylacetylene	0.00864764										0.00864764
103.041	C7H5N	Benzonitrile	0.125713										0.125713
104.062	C8H8	Styrene	0.116303			0.143085			0.0270667	0.0664224	0.0467445	0.0278287	0.129694	0.0189376
105.057	C7H7N	Vinylpyridine	0.0056353										0.0056353
106.041	C7H6O	Benzaldehyde	0.0673791			0.0839315							0.0756553	0.0117043
106.078	C8H10	Ethyl benzene + m-xylene + p-xylene + o-xylene	0.397517			0.708184			0.266759	0.613975	0.440367	0.245519	0.552851	0.219675
106.16	C8H10	Ethylbenzene							0.0417128	0.121267	0.0814901	0.0562535
106.16	C8H10	m/p-Xylene							0.121893	0.240834	0.181364	0.0841041
106.16	C8H10	o-Xylene							0.103153	0.251873	0.177513	0.105161
107.036	C6H5NO	pyridine aldehyde + methylfuronitrile + nitrosobenzene	0.0146085										0.0146085
107.073	C7H9N	dimethyl pyridine + ethylpyridine + heptylnitriles	0.0242961										0.0242961
108.02	C6H4O2	Quinone (=p-Benzoquinone)	0.0557913										0.0557913
108.057	C7H8O	2-Methylphenol (=o-cresol) + anisol	0.958439			0.141025							0.549732	0.578
109.088	C7H11N	C7 acrylonitrile	0.0124683										0.0124683
110.036	C6H6O2	5-Methyl furfural +Benzene diols (=catechol, resorcinol)	1.05378			0.679742							0.866761	0.264485
110.072	C7H10O	C3 furan + various HCO	0.186228			0.212886							0.199557	0.0188499
111.031	C5H5NO2	dihydroxy pyridine + methyl maleimide	0.0238949										0.0238949
112.015	C5H4O3	5-Hydroxy 2-furfural/2-furoic acid	0.159778			0.258829							0.209304	0.0700397
112.052	C6H8O2	2-hydroxy-3-methyl-2-cyclopenten-1-one	0.133094			0.206556							0.169825	0.051945
112.088	C7H12O	Ethylcyclopentanone	0.037632										0.037632
112.24	C8H16	1-Octene							0.06515	0.209783	0.137466	0.102271
113.011	C4H3NO3	Nitrofuran	0.00111233										0.00111233
114.031	C5H6O3	5-hydroxymethyl-2[3H]-furanone	0.0840678			0.156454							0.120261	0.0511849
114.067	C6H10O2	C6 Diones + C6 1-DBE esters	0.0579519										0.0579519
114.104	C7H14O	heptanal + 2,4-dimethyl-3-pentanone + heptanone	0.0172805										0.0172805
114.23	C8H18	n-Octane							0.0979854	0.293408	0.195697	0.138185
116.047	C5H8O3	5-hydroxymethyl tetrahydro 2-furanone + 5-hydroxy tetrahydro 2-furfural	0.0144635			0.0429025							0.028683	0.0201094
116.062	C9H8	Indene + propynyl benzene isomer	0.0429709			0.0466859							0.0448284	0.00262695
116.083	C6H12O2	C6 esters	0.0417736			0.108831							0.0753021	0.0474164
117.042	C4H7NO3	butene nitrates	0.00644413										0.00644413
117.057	C8H7N	benzeneacetonitrile	0.0211585										0.0211585
118.041	C8H6O	Benzofuran	0.0658342			0.0433956							0.0546149	0.0158665
118.078	C9H10	Indane + methyl styrenes + propenyl benzenes	0.109387			0.135205							0.122296	0.0182558
119.073	C8H9N	Dihydro pyridine	0.00340591										0.00340591
120.057	C8H8O	Tolualdehyde	0.117855			0.142524							0.13019	0.0174438
120.093	C9H12	C9 Aromatics	0.214297			0.41875			0.253384	0.198195	0.22579	0.0390246	0.316524	0.14457
120.195	C9H12	i-Propylbenzene							0.00534258	0.00152256	0.00343257	0.00270116
120.195	C9H12	n-Propylbenzene							0.0117554	0.0309098	0.0213326	0.0135442
120.195	C9H12	3-Ethyltoluene							0.0269602	0.0196459	0.0233031	0.00517202
120.195	C9H12	4-Ethyltoluene							0.0235036	0.0183485	0.0209261	0.00364521
120.195	C9H12	2-Ethyltoluene							0.0415877	0.0307776	0.0361826	0.00764389
120.195	C9H12	1,3,5-Trimethylbenzene							0.0108007	0.0113478	0.0110743	0.00038687
120.195	C9H12	1,2,4-Trimethylbenzene							0.0695647	0.0856432	0.077604	0.0113692
120.195	C9H12	1,2,3-Trimethylbenzene							0.0638695		0.0638695
122.036	C7H6O2	2-hydroxybenzaldehyde (=Salicylaldehyde)	0.319945			0.307738							0.313841	0.00863148
122.072	C8H10O	C2 Phenols + methyl anisol	0.264501			0.334081							0.299291	0.0492004
123.031	C6H5NO2	Nitrobenzene	0.0142357										0.0142357
124.015	C6H4O3	Hydroxy benzoquinone	0.0442388			0.149466							0.0968523	0.0744068
124.052	C7H8O2	Guaiacol (=2-methoxyphenol)	0.537273			0.966493							0.751883	0.303505
125.12	C8H15N	C8 nitriles	0.00449624										0.00449624
125.962	C2H6S3	Dimethyl trisulfide	0.000407023										0.000407023
126.031	C6H6O3	5-(hydroxymethyl)-2-furfural	0.290895			0.340813							0.315854	0.0352979
128.047	C6H8O3	2,5-di(hydroxymethyl)furan + Methyl hydroxy dihydrofurfural	0.0699536										0.0699536
128.062	C10H8	Naphthalene	0.0812936			0.230946							0.15612	0.10582
128.2	C9H20	n-Nonane							0.0895269	0.215435	0.152481	0.0890308
130.078	C10H10	Dihydronaphthalene	0.0751688										0.0751688
131.073	C9H9N	Methyl benzeneacetonitrile	0.0110941										0.0110941
132.057	C9H8O	Methyl benzofuran	0.104441										0.104441
132.093	C10H12	Methyl propenyl benzene + ethyl styrene	0.0836511										0.0836511
134.072	C9H10O	3-methylacetophenone	0.0486811			0.0894921							0.0690866	0.0288577
134.109	C10H14	C10 Aromatics	0.117888			0.2692							0.193544	0.106994
136.052	C8H8O2	Methyl benzoic acid	0.106272			0.147489							0.12688	0.0291446
136.124	C10H16	Monoterpenes	0.383815			0.235282					0.00465827		0.309549	0.105028
136.23	C10H16	alpha-Pinene							0.00298553		0.00298553
136.23	C10H16	beta-Pinene							0.00167275		0.00167275
137.047	C7H7NO2	nitrotoluene	0.0143625										0.0143625
138.067	C8H10O2	2-Methoxy-4-methylphenol (= creosol)	0.235619										0.235619
140.047	C7H8O3	3-Methoxycatechol (3-Methoxy-1,2-Benzenediol)10	0.0784423			0.200641							0.139542	0.0864076
140.27	C10H20	1-Decene							0.0497961	0.15593	0.102863	0.075048
141.94	CH3I	Iodomethane							0.0124939	0.0188959	0.0156949	0.00452687
142.078	C11H10	Methyl naphthalene	0.0844933										0.0844933
142.29	C10H22	n-Decane							0.0743931	0.123188	0.0987904	0.034503
144.042	C6H8O4	Product of levoglucosan dehydration (pyrolysis)	0.397087										0.397087
144.057	C10H8O	2-ethenyl benzofuran	0.00928686			0.336084							0.172686	0.231081
144.093	C11H12	ethylindene	0.0715011			0.290841							0.181171	0.155097
146.072	C10H10O	dimethylbenzofuran	0.0986122			0.127245							0.112928	0.0202461
148.088	C10H12O	Methyl chavicol (estragole)	0.0384778										0.0384778
148.124	C11H16	C11 aromatics	0.0566597			0.269091							0.162876	0.150212
150.067	C9H10O2	Vinyl guaiacol	0.102762			0.296677							0.19972	0.137119
152.047	C8H8O3	Vanillin	0.150994										0.150994
152.062	C12H8	Acenaphthylene	0.00269853										0.00269853
152.119	C10H16O	Camphor + other oxygenated monoterpenes	0.0323949										0.0323949
154.062	C8H10O3	syringol	0.051911			0.348874							0.200393	0.209985
154.135	C10H18O	Cineole + other oxygenated monoterpenes	0.0206978										0.0206978
156.093	C12H12	1,3-dimethylnaphthalene	0.11437										0.11437
156.151	C10H20O	decanal	0.0121926										0.0121926
156.31	C11H24	n-Undecane								0.0487534	0.0487534
162.14	C12H18	C12 aromatics	0.037704										0.037704
164.083	C10H12O2	Eugenol + isoeugenol	0.0631288										0.0631288
176.156	C13H20	C13 aromatics	0.032275										0.032275
204.187	C15H24	Sesquiterpenes	0.309193										0.309193
		Sum unassigned NMOG masses	5.592			10.069							7.8305	3.16572
		Sum assigned NMOG masses	44.1998			49.677	67.19	17.19	32.8718	19.7536			46.9384	3.87294
		Sum NMOG field & lab									30.5376		55.5667
NOTES:	N2O is not included in table, see Hamada et al for extensive justification.
	Koss et al. (2018) EF were adjusted upwards to account for correct fuel carbon fraction as described in text.
	All FIREX "unknowns" are listed at the end of Koss et al. (2018) supplementary tables.
	If either Koss (2018) or Stockwell (2016) assigned a mass we accepted it. If both assigned a mass and they were different we used more recent Koss assignment.
	Stockwell total by FTIR + PTR-TOF-MS - assigned here by Stockwell or Koss later
	We don't try to assign neutral formulas for PTR-MS unknowns since we cannot be sure if we ionized via charge exchange with a neutral or adding a proton to a radical
	Glyoxal data from Zarzana et al., (2018) and they report methylglyoxal < PTR sum of methylglyoxal+acrylic acid. We corrected Christian et al EF as described in Akagi et al. (2011).

## Sheet: Fig S1 lab v field plot
													Fig. S1) The lab average EF versus the field average EF for the 25 species measured in both settings (slope 1.13, r2 0.841). When methane and ammonia are excluded (both are gasification indicators), agreement between lab and field EFs improves further (slope 1.04, r2 0.88).
